# Supplementary material for: Access to primary care for children and young people (CYP) in the UK: a scoping review of CYP’s, caregivers’ and healthcare professionals’ views and experiences of facilitators and barriers
Source: PubMed Central journal article supplement (PMC11141190; doi:10.1136/bmjopen-2023-081620), 2024-05-30
Supplement: bmjopen-2023-081620supp003.pdf [file bmjopen-2023-081620supp003.pdf]

## Additional file 3: Quality assessment

To achieve 'high' quality, at least five MMAT criteria had to be met, with breadth and depth of analysis, for 'medium' at least four criteria had to be met, and all other studies were rated 'low'. For a judgement of 'high' relevance, studies had to describe, with breadth and depth, factors influencing primary care access and privilege participants' perspectives.

NB there were no randomized controlled trials in the studies so the MMAT questions for section 2 have been removed here.

|                                            |                                                                                                                                                                                                                                                                                                                                                                                                                                                                                                                                                                          |
|--------------------------------------------|--------------------------------------------------------------------------------------------------------------------------------------------------------------------------------------------------------------------------------------------------------------------------------------------------------------------------------------------------------------------------------------------------------------------------------------------------------------------------------------------------------------------------------------------------------------------------|
| <b>SCREENING QUESTIONS</b>                 | S1. Are there clear research questions?<br>S2. Do the collected data allow to address the research questions?                                                                                                                                                                                                                                                                                                                                                                                                                                                            |
| <b>1. QUALITATIVE STUDIES</b>              | 1.1. Is the qualitative approach appropriate to answer the research question?<br>1.2. Are the qualitative data collection methods adequate to address the research question?<br>1.3. Are the findings adequately derived from the data?<br>1.4. Is the interpretation of results sufficiently substantiated by data?<br>1.5. Is there coherence between qualitative data sources, collection, analysis and interpretation?                                                                                                                                               |
| <b>3. NON-RANDOMIZED STUDIES</b>           | 3.1. Are the participants representative of the target population?<br>3.2. Are measurements appropriate regarding both the outcome and intervention (or exposure)?<br>3.3. Are there complete outcome data?<br>3.4. Are the confounders accounted for in the design and analysis?<br>3.5. During the study period, is the intervention administered (or exposure occurred) as intended?                                                                                                                                                                                  |
| <b>4. QUANTITATIVE DESCRIPTIVE STUDIES</b> | 4.1. Is the sampling strategy relevant to address the research question?<br>4.2. Is the sample representative of the target population?<br>4.3. Are the measurements appropriate?<br>4.4. Is the risk of nonresponse bias low?<br>4.5. Is the statistical analysis appropriate to answer the research question?                                                                                                                                                                                                                                                          |
| <b>5. MIXED METHODS STUDIES</b>            | 5.1. Is there an adequate rationale for using a mixed methods design to address the research question?<br>5.2. Are the different components of the study effectively integrated to answer the research question?<br>5.3. Are the outputs of the integration of qualitative and quantitative components adequately interpreted?<br>5.4. Are divergences and inconsistencies between quantitative and qualitative results adequately addressed?<br>5.5. Do the different components of the study adhere to the quality criteria of each tradition of the methods involved? |

|                        |      | SCREENING QUESTIONS |            | 1. QUALITATIVE STUDIES |            |            |            |            | Total MMAT | W1 - quality | W2 - relevance |
|------------------------|------|---------------------|------------|------------------------|------------|------------|------------|------------|------------|--------------|----------------|
| First author           | Year | S1                  | S2         | 1.1                    | 1.2        | 1.3        | 1.4        | 1.5        |            |              |                |
| Ahmaro et al           | 2021 | Yes                 | Yes        | Yes                    | Yes        | Yes        | Yes        | Yes        | 5          | High         | High           |
| Alexakis et al         | 2015 | Yes                 | Yes        | Yes                    | Yes        | Yes        | Yes        | Yes        | 5          | High         | High           |
| Appleton et al         | 2022 | Yes                 | Yes        | Yes                    | Yes        | Yes        | Yes        | Yes        | 5          | High         | High           |
| Bosley et al           | 2021 | Yes                 | Yes        | Yes                    | Yes        | Yes        | Yes        | Yes        | 5          | Medium       | Medium         |
| Brigham et al          | 2012 | Can't tell          | Can't tell | Yes                    | Yes        | Yes        | No         | Can't tell | 3          | Low          | Low            |
| Coleman-Fountain et al | 2020 | Yes                 | Yes        | Yes                    | Yes        | Yes        | Yes        | Yes        | 5          | High         | Low            |
| Condon et al           | 2020 | Yes                 | Yes        | Yes                    | Yes        | Yes        | Yes        | Yes        | 5          | High         | Low            |
| Corry and Leavey       | 2017 | Yes                 | Yes        | Yes                    | Yes        | Yes        | Yes        | Yes        | 5          | High         | High           |
| Crouch et al           | 2019 | Yes                 | Yes        | Yes                    | Yes        | Yes        | Yes        | Yes        | 5          | High         | Medium         |
| Dando et al            | 2019 | Yes                 | Yes        | Yes                    | Yes        | Yes        | Yes        | Can't tell | 4          | Low          | Low            |
| Davey et al            | 2013 | Yes                 | Yes        | Yes                    | Yes        | Yes        | Can't tell | Yes        | 4          | Medium       | High           |
| Dickson                | 2015 | Yes                 | Yes        | Yes                    | Yes        | Yes        | No         | No         | 3          | Low          | Medium         |
| Diwakar et al          | 2019 | Yes                 | Yes        | Yes                    | No         | Yes        | Yes        | Yes        | 4          | Medium       | Medium         |
| Eskyté et al           | 2021 | Yes                 | Yes        | Yes                    | Yes        | Yes        | Yes        | Yes        | 5          | High         | Low            |
| Fox et al              | 2017 | Yes                 | Can't tell | Yes                    | Yes        | Yes        | Yes        | Yes        | 5          | High         | High           |
| French et al           | 2020 | Yes                 | Yes        | Yes                    | Yes        | Yes        | Yes        | Yes        | 5          | Medium       | High           |
| Henderson and Rubin    | 2014 | Can't tell          | Yes        | No                     | No         | Can't tell | Yes        | Can't tell | 3          | Low          | Low            |
| Ingram et al           | 2013 | Yes                 | Yes        | Yes                    | Yes        | Yes        | Yes        | No         | 4          | Medium       | High           |
| Jobanputra and Singh   | 2020 | Yes                 | Yes        | Yes                    | No         | Yes        | No         | Yes        | 3          | Low          | Medium         |
| Jones et al            | 2017 | Yes                 | Yes        | Yes                    | Yes        | Yes        | Yes        | Yes        | 5          | High         | High           |
| Lewney et al           | 2019 | Yes                 | Yes        | Yes                    | Yes        | Yes        | Yes        | Yes        | 5          | High         | Medium         |
| McDonagh et al         | 2019 | Yes                 | Yes        | Yes                    | No         | Yes        | Yes        | Yes        | 4          | Medium       | High           |
| Mughal et al           | 2021 | Yes                 | Yes        | Yes                    | Yes        | Yes        | Yes        | Can't tell | 4          | Medium       | High           |
| Muirhead et al         | 2017 | Yes                 | Yes        | Yes                    | Yes        | Can't tell | Yes        | Yes        | 4          | Medium       | Low            |
| Neill et al            | 2016 | Yes                 | Yes        | Yes                    | Yes        | Yes        | Yes        | Yes        | 5          | High         | High           |
| Neill et al            | 2015 | Yes                 | Yes        | Yes                    | Yes        | Yes        | Yes        | Yes        | 5          | High         | High           |
| O'Brien et al          | 2017 | Yes                 | Yes        | Yes                    | Yes        | Yes        | Yes        | Yes        | 5          | High         | High           |
| Ochieng                | 2020 | Yes                 | Yes        | Yes                    | Yes        | Yes        | Yes        | Yes        | 5          | High         | Low            |
| Rapley et al           | 2021 | Yes                 | Yes        | Yes                    | Yes        | Yes        | Yes        | Yes        | 5          | High         | High           |
| Redsell et al          | 2013 | Yes                 | Can't tell | Yes                    | Can't tell | No         | Yes        | No         | 2          | Low          | Low            |

|                    |      |     |            |            |            |            |     |     |   |        |        |
|--------------------|------|-----|------------|------------|------------|------------|-----|-----|---|--------|--------|
| Roberts et al      | 2014 | Yes | Can't tell | Yes        | No         | Yes        | Yes | No  | 3 | Low    | High   |
| Roberts and Condon | 2014 | Yes | Yes        | Yes        | No         | Yes        | Yes | Yes | 4 | Low    | Low    |
| Satherley et al    | 2021 | Yes | Yes        | Yes        | Yes        | Yes        | Yes | Yes | 5 | High   | High   |
| Turnbull et al     | 2021 | Yes | Yes        | Yes        | Yes        | Can't tell | Yes | Yes | 4 | Medium | High   |
| Turner et al       | 2012 | Yes | Yes        | Can't tell | Yes        | Yes        | No  | Yes | 3 | Low    | High   |
| Williams et al     | 2014 | Yes | Yes        | Yes        | Can't tell | Yes        | Yes | Yes | 4 | Low    | Low    |
| Williams et al     | 2012 | No  | Yes        | Yes        | Yes        | Yes        | Yes | Yes | 5 | Medium | Medium |

|                   |      | SCREENING QUESTIONS |            | 3. NON-RANDOMIZED STUDIES |     |     |            |     | Total MMAT | W1 - quality | W2 - relevance |
|-------------------|------|---------------------|------------|---------------------------|-----|-----|------------|-----|------------|--------------|----------------|
| First author      | Year | S1                  | S2         | 3.1                       | 3.2 | 3.3 | 3.4        | 3.5 |            |              |                |
| O'Brien et al     | 2019 | Yes                 | Yes        | Yes                       | Yes | Yes | Yes        | Yes | 5          | High         | Low            |
| Usher-Smith et al | 2015 | Yes                 | Can't tell | Yes                       | Yes | Yes | Can't tell | Yes | 4          | Medium       | Medium         |
| Yassaee et al     | 2017 | Yes                 | Yes        | Yes                       | Yes | Yes | Can't tell | Yes | 4          | High         | Low            |

|              |      | SCREENING QUESTIONS |     | 4. QUANTITATIVE DESCRIPTIVE STUDIES |     |     |     |     | Total MMAT | W1 - quality | W2 - relevance |
|--------------|------|---------------------|-----|-------------------------------------|-----|-----|-----|-----|------------|--------------|----------------|
| First author | Year | S1                  | S2  | 4.1                                 | 4.2 | 4.3 | 4.4 | 4.5 |            |              |                |
| Coyle et al  | 2013 | Yes                 | Yes | Can't tell                          | No  | Yes | Yes | No  | 2          | Low          | Low            |

|                      |      | SCREENING QUESTIONS |     | 5. MIXED METHODS STUDIES |            |     |            |            | Total MMAT | W1 - quality | W2 - relevance |
|----------------------|------|---------------------|-----|--------------------------|------------|-----|------------|------------|------------|--------------|----------------|
| First author         | Year | S1                  | S2  | 5.1                      | 5.2        | 5.3 | 5.4        | 5.5        |            |              |                |
| Crocker et al        | 2013 | Yes                 | Yes | Yes                      | Yes        | Yes | Yes        | No         | 4          | Low          | Low            |
| Fox et al            | 2015 | Yes                 | Yes | Yes                      | Yes        | Yes | No         | Yes        | 4          | Medium       | Medium         |
| Rashed et al         | 2022 | Yes                 | Yes | Can't tell               | Can't tell | Yes | Yes        | Can't tell | 2          | Low          | Medium         |
| Rickett et al        | 2021 | Yes                 | Yes | Yes                      | Yes        | Yes | Yes        | Yes        | 5          | Medium       | High           |
| Salaheddin and Mason | 2016 | Yes                 | Yes | Can't tell               | Yes        | Yes | Can't tell | Yes        | 3          | Low          | Low            |
| Wilson et al         | 2021 | Yes                 | Yes | Yes                      | Yes        | Yes | No         | Can't tell | 3          | Low          | Low            |
