# Supplementary material for: Access to primary care for children and young people (CYP) in the UK: a scoping review of CYP’s, caregivers’ and healthcare professionals’ views and experiences of facilitators and barriers
Source: PubMed Central journal article supplement (PMC11141190; doi:10.1136/bmjopen-2023-081620), 2024-05-30
Supplement: bmjopen-2023-081620supp006.pdf [file bmjopen-2023-081620supp006.pdf]

## Supplementary tables

Table 1: Characteristics of studies included

| Author (year)<br>sample<br>location             | Primary healthcare setting: main focus of<br>study                                                                                                                     | Design                                   | Sample<br>population | Sample size                                   | Focused on CYP in the<br>following age bands: |      |       | Quality<br>rating<br>High/med/<br>low | Relevance<br>rating<br>High/med/<br>low |
|-------------------------------------------------|------------------------------------------------------------------------------------------------------------------------------------------------------------------------|------------------------------------------|----------------------|-----------------------------------------------|-----------------------------------------------|------|-------|---------------------------------------|-----------------------------------------|
|                                                 |                                                                                                                                                                        |                                          |                      |                                               | <5                                            | 5–15 | 16–25 |                                       |                                         |
| Ahmaro <i>et al.</i><br>(2021)<br>England       | Pharmacies: perceptions of YP about sexual health and chlamydia testing and chlamydia treatment.                                                                       | Qualitative; interviews                  | YP                   | 26                                            |                                               |      | ✓     | High                                  | High                                    |
| Alexakis <i>et al.</i><br>(2015)<br>England     | General practice: understanding the specific issues and service needs of YP with inflammatory bowel disease from black and ethnic minority communities.                | Qualitative; interviews                  | YP                   | 20                                            |                                               |      | ✓     | High                                  | High                                    |
| Appleton <i>et al.</i><br>(2022)<br>England     | General practice: exploring the experiences and views of CYP and caregivers of CYP receiving primary care support after child and adolescent mental health services.   | Qualitative; interviews                  | YP and caregivers    | 14 YP and 13 parents                          |                                               |      | ✓     | High                                  | High                                    |
| Bosley <i>et al.</i><br>(2021)<br>England       | General practice and health visiting: mothers' views on the accessibility and expertise of healthcare professionals caring for their child's health.                   | Qualitative; focus groups and interviews | Caregivers           | 6 focus groups (16 parents) and 14 interviews | ✓                                             |      |       | Medium                                | Medium                                  |
| Brigham <i>et al.</i><br>(2012)<br>England      | Health visiting: health visitors' (HVs) perceptions of their role and skills, how they share expertise, and work with other agencies.                                  | Qualitative; focus groups                | HCPs                 | 4 focus groups (32 HVs)                       | ✓                                             |      |       | Low                                   | Low                                     |
| Coleman-Fountain <i>et al.</i><br>(2020)<br>n/k | General practice: exploring how autistic young adults understand and manage mental health problems.                                                                    | Qualitative; interviews                  | YP                   | 19                                            |                                               |      | ✓     | High                                  | Low                                     |
| Condon <i>et al.</i><br>(2020)<br>England       | General practice and health visiting: parents' experiences of using child health services for their children post-migration from Romania, Poland, Pakistan or Somalia. | Qualitative; focus groups                | Caregivers           | Five focus groups (28 parents)                | ✓                                             |      |       | High                                  | Low                                     |

|                                                                    |                                                                                                                                                                                |                                                 |            |                                                     |   |     |   |        |        |
|--------------------------------------------------------------------|--------------------------------------------------------------------------------------------------------------------------------------------------------------------------------|-------------------------------------------------|------------|-----------------------------------------------------|---|-----|---|--------|--------|
| Corry and Leavey (2017)<br><i>Northern Ireland</i>                 | <i>General practice</i> : adolescents' attitudes to consulting their GP about psychological problems.                                                                          | Qualitative; focus groups                       | YP         | Nine focus groups (54 YP)                           |   | ✓   | ✓ | High   | High   |
| Coyle <i>et al.</i> (2013)<br><i>Northern Ireland and Scotland</i> | <i>Dental care</i> : investigated practitioners' willingness to treat adolescents with learning disabilities (LD) in primary dental care.                                      | Quantitative; survey                            | HCPs       | 300                                                 |   | ✓   | ✓ | Low    | Low    |
| Crocker <i>et al.</i> (2013)<br><i>Wales</i>                       | <i>General practice</i> : identifying differences between children who consulted a GP and those who did not before the day of hospital presentation with pneumonia or empyema. | Mixed methods; survey and structured interviews | Caregivers | 151 survey participants of whom 79 were interviewed | ✓ | ✓   |   | Low    | Low    |
| Crouch <i>et al.</i> (2019)<br><i>England</i>                      | <i>General practice</i> : understanding families' experiences of seeking help and accessing specialist treatment for childhood anxiety                                         | Qualitative; interviews                         | Caregivers | 16                                                  |   | ✓   |   | High   | Medium |
| Dando <i>et al.</i> (2019)<br><i>England</i>                       | <i>General practice</i> : understanding the healthcare experiences of Albanian survivors of modern slavery and sexual exploitation                                             | Qualitative; interviews                         | Caregivers | 7 participants of whom 6 were caregivers            | ✓ | n/k |   | Low    | Low    |
| Davey <i>et al.</i> (2013)<br><i>England</i>                       | <i>General practice and walk-in centres</i> : explored the needs and experiences of young adults of primary healthcare services.                                               | Qualitative; interviews                         | YP         | 20                                                  |   |     | ✓ | Medium | High   |
| Dickson (2015)<br><i>Northern Ireland</i>                          | <i>Dental care</i> : parents' perceptions of factors influencing dental registrations of children living within a Sure Start area.                                             | Qualitative; interviews                         | Caregivers | 8                                                   | ✓ |     |   | Low    | Medium |
| Diwakar <i>et al.</i> (2019)<br><i>England</i>                     | <i>General practice</i> : understanding parent experiences with paediatric allergy pathways.                                                                                   | Qualitative; interviews                         | Caregivers | 18                                                  | ✓ | ✓   |   | Medium | Medium |
| Eskytë <i>et al.</i> (2021)<br><i>England</i>                      | <i>Health visiting</i> : organisational factors that obstruct HVs from speaking to parents of babies about oral health                                                         | Qualitative; interviews and focus groups        | HCPs       | 3 focus groups (15 HVs)<br>3 interviews             | ✓ |     |   | High   | Low    |

|                                               |                                                                                                                                                                                |                                             |                                        |                                                                                                                  |     |     |     |        |        |
|-----------------------------------------------|--------------------------------------------------------------------------------------------------------------------------------------------------------------------------------|---------------------------------------------|----------------------------------------|------------------------------------------------------------------------------------------------------------------|-----|-----|-----|--------|--------|
| Fox <i>et al.</i> (2017)<br><i>England</i>    | <i>General practice and health visiting</i> : assessed what families affected by autism need and how health, education, and social care services can support them.             | Qualitative; interviews                     | Caregivers                             | 15                                                                                                               | ✓   | ✓   |     | High   | High   |
| Fox <i>et al.</i> (2015)<br><i>England</i>    | <i>General practice</i> : GP's capabilities, motivations and opportunities for discussing self-harm and to identify barriers to and enablers for discussing self-harm with YP. | Mixed methods; online survey and interviews | HCPs                                   | 28 (online survey) 10 (interviews)                                                                               |     | ✓   | ✓   | Medium | Medium |
| French <i>et al.</i> (2020)<br><i>UK</i>      | <i>General practice</i> : exploring the primary care experiences of referral and management of ADHD                                                                            | Qualitative; interviews                     | HCPs, adults with ADHD, caregivers     | 5 primary HCP, 5 adults with ADHD, 5 caregivers, 5 secondary HCP                                                 | n/k | n/k | n/k | Medium | High   |
| Henderson and Rubin (2014)<br><i>England</i>  | <i>Dental care</i> : dental, school and family perspectives of an oral health promotion initiative to improve access for pre-school children in deprived communities.          | Qualitative; focus groups and interviews    | HCPs, school staff, caregivers and CYP | 6 focus groups (24 dental practitioners), 9 interviews (school staff), 4 interviews (caregivers and their child) | ✓   | ✓   |     | Low    | Low    |
| Ingram <i>et al.</i> (2013)<br><i>n/k</i>     | <i>General practice</i> : to explore parents' views on support and information needs prior to consulting when children have respiratory tract infections with a cough          | Qualitative; focus groups and interviews    | Caregivers                             | 60                                                                                                               | ✓   | ✓   |     | Medium | High   |
| Jobanputra and Singh (2020)<br><i>England</i> | <i>General practice</i> : exploring GPs' views on the management of adolescents with mental health disorders                                                                   | Qualitative; interviews                     | HCPs                                   | 8                                                                                                                |     | ✓   | ✓   | Low    | Medium |
| Jones <i>et al.</i> (2017)<br><i>England</i>  | <i>General practice</i> : young adults' opinions of receiving chlamydia testing with condom provision, contraceptive information, and HIV testing.                             | Qualitative; interviews                     | YP                                     | 30                                                                                                               |     |     | ✓   | High   | High   |

|                                                 |                                                                                                                                                                                        |                                          |                     |                                                         |   |   |   |        |        |
|-------------------------------------------------|----------------------------------------------------------------------------------------------------------------------------------------------------------------------------------------|------------------------------------------|---------------------|---------------------------------------------------------|---|---|---|--------|--------|
| Lewney <i>et al.</i> (2019)<br><i>England</i>   | <i>Health visiting</i> : exploring how HVs feel about providing oral health advice and dealing with dental issues                                                                      | Qualitative; interviews                  | HCPs                | 17                                                      | ✓ |   |   | High   | Medium |
| McDonagh <i>et al.</i> (2020)<br><i>UK</i>      | <i>General practice</i> : YPs' perspectives on barriers to chlamydia testing and potential intervention functions and implementation strategies to overcome identified barriers.       | Qualitative; interviews                  | YP                  | 28                                                      |   |   | ✓ | Medium | High   |
| Mughal <i>et al.</i> (2021)<br><i>England</i>   | <i>General practice</i> : the help-seeking behaviours, experiences of GP care, and access to the general practice of YP who self-harm.                                                 | Qualitative; interviews                  | YP                  | 13                                                      |   |   | ✓ | Medium | High   |
| Muirhead <i>et al.</i> (2017)<br><i>England</i> | <i>Dental care</i> : to understand foster carers' oral health knowledge, attitudes, and experiences of managing foster children's oral health.                                         | Qualitative; focus groups                | Caregivers          | 12                                                      |   | ✓ | ✓ | Medium | Low    |
| Neill <i>et al.</i> (2016)*<br><i>England</i>   | <i>Primary care (all except dental and optometry)</i> : how parents from different socio-economic groups use the information to make decisions during acute childhood illness at home. | Qualitative; focus groups and interviews | Caregivers          | Five focus groups (24 parents) and 3 interviews         | ✓ |   |   | High   | High   |
| Neill <i>et al.</i> (2015)*<br><i>England</i>   | <i>Primary care (all except dental and optometry)</i> : parents' use of information resources during decision-making in acute childhood illness at home.                               | Qualitative; focus groups and interviews | Caregivers          | Five focus groups (24 parents) and 3 interviews         | ✓ |   |   | High   | High   |
| O'Brien <i>et al.</i> (2019)<br><i>England</i>  | <i>General practice</i> : GPs experiences of barriers to and facilitators of identifying, managing, and accessing specialist services for anxiety disorders.                           | Quantitative; cross-sectional survey     | HCPs                | 971                                                     | ✓ | ✓ |   | High   | Low    |
| O'Brien <i>et al.</i> (2017)<br><i>England</i>  | <i>General practice</i> : explore the experiences of GPs in identification, management, and access to specialist services for anxiety disorders.                                       | Qualitative; interviews                  | HCPs                | 20                                                      | ✓ | ✓ |   | High   | High   |
| Ochieng (2020)<br><i>England</i>                | <i>Health visiting</i> : the sociocultural, family, and environmental factors that either influence healthy weight in black African children.                                          | Qualitative; focus groups                | Caregivers and HCPs | 4 focus groups (30 parents) and 3 focus groups (32 HVs) | ✓ | ✓ |   | High   | Low    |

|                                                                     |                                                                                                                                                                             |                                              |                     |                                                                            |   |   |   |        |        |
|---------------------------------------------------------------------|-----------------------------------------------------------------------------------------------------------------------------------------------------------------------------|----------------------------------------------|---------------------|----------------------------------------------------------------------------|---|---|---|--------|--------|
| Rapley <i>et al.</i> (2021)<br><i>England</i>                       | <i>Primary care (all except optometry)</i> : exploring the experiences of care, from initial symptoms to initial referral to paediatric rheumatology.                       | Qualitative; interviews                      | Caregivers and HCPs | 51 interviews with caregivers (related to 36 CYP), 11 interviews with HCPs | ✓ | ✓ | ✓ | High   | High   |
| Rashed <i>et al.</i> (2022)<br><i>England</i>                       | <i>Pharmacy and general practice</i> : exploring the experiences, barriers and recommendations of caregivers and YP regarding the use of community pharmacies for children. | Mixed; survey with closed and open questions | Caregivers and YP   | 213 caregivers and 20 YP                                                   | ✓ | ✓ | ✓ | Low    | Medium |
| Redsell <i>et al.</i> (2013)<br><i>England</i>                      | <i>Health visiting</i> : investigated the beliefs and current practices of UK HVs concerning recognising and intervening with infants at risk of developing obesity.        | Qualitative; interviews                      | HCPs                | 30                                                                         | ✓ |   |   | Low    | Low    |
| Rickett <i>et al.</i> (2021)<br><i>Scotland, Wales, and England</i> | <i>General practice</i> : to understand the healthcare expectations and experiences of caregivers seeking support for their gender diverse children                         | Mixed; survey with closed and open questions | Caregivers          | 75                                                                         | ✓ | ✓ |   | Medium | High   |
| Roberts <i>et al.</i> (2014)<br><i>England</i>                      | <i>General practice</i> : GPs' experiences and perceptions of consulting with adolescents who present with psychological difficulties.                                      | Qualitative; interviews                      | HCPs                | 19                                                                         |   | ✓ | ✓ | Low    | High   |
| Roberts and Condon (2014)<br><i>England</i>                         | <i>Dental care</i> : exploring parental attitudes to pre-school oral health.                                                                                                | Qualitative; interviews                      | Caregivers          | 12                                                                         | ✓ |   |   | Low    | Low    |
| Salaheddin and Mason (2016)<br><i>UK</i>                            | <i>General practice</i> : exploring the barriers to accessing mental health support among young adults.                                                                     | Mixed; survey with closed and open questions | YP                  | 203                                                                        |   |   | ✓ | Low    | Low    |
| Satherley <i>et al.</i> (2021)<br><i>England</i>                    | <i>General practice</i> : how mothers living in deprived neighbourhoods support their children with health conditions.                                                      | Qualitative; interviews                      | Caregivers          | 8                                                                          | ✓ | ✓ |   | High   | High   |
| Turnbull <i>et al.</i> (2021)<br><i>England</i>                     | <i>Pharmacy and sexual health clinic</i> : young women's experiences of accessing emergency contraception pills from pharmacies and sexual health clinics.                  | Qualitative; interviews                      | YP                  | 21                                                                         |   |   | ✓ | Medium | High   |

|                                                           |                                                                                                                                                                                                                                                    |                                                      |                                           |                                                                                                                                  |     |     |     |        |        |
|-----------------------------------------------------------|----------------------------------------------------------------------------------------------------------------------------------------------------------------------------------------------------------------------------------------------------|------------------------------------------------------|-------------------------------------------|----------------------------------------------------------------------------------------------------------------------------------|-----|-----|-----|--------|--------|
| Turner <i>et al.</i> (2012)<br><i>England</i>             | <i>General practice</i> : exploring parents' views and experiences of primary care as a treatment setting for childhood obesity.                                                                                                                   | Qualitative; interviews                              | Caregivers                                | 15                                                                                                                               |     | ✓   |     | Low    | High   |
| Usher-Smith <i>et al.</i> (2015)<br><i>England</i>        | <i>General practice and secondary care</i> : Explored the pathway to diagnosis of type 1 diabetes.                                                                                                                                                 | Quantitative; survey                                 | Caregivers                                | 87                                                                                                                               | ✓   | ✓   |     | Medium | Medium |
| Williams <i>et al.</i> (2014)<br><i>England and Wales</i> | <i>Dental care</i> : the impact of a community-based dental care pathway on children's dental care entering residential or foster care.                                                                                                            | Qualitative; interviews and routinely collected data | HCPs, social workers, CYP, and caregivers | Routinely collected data on 89 CYP<br>Dental health professionals (n=6)<br>Social workers (n=2)<br>CYP (n=3)<br>Caregivers (n=5) | ✓   | ✓   | ✓   | Low    | Low    |
| Williams <i>et al.</i> (2012)<br><i>England</i>           | <i>Not specified (preventative primary care services)</i> : Described African and African-Caribbean fathers' beliefs about fatherhood, health and preventive primary care services.                                                                | Qualitative; focus groups                            | Caregivers                                | 9 focus groups (46 parents)                                                                                                      | n/k | n/k | n/k | Medium | Medium |
| Wilson <i>et al.</i> (2021)<br><i>England</i>             | <i>Optometric practices</i> : accessibility of eye care for children with typical development and those with autism.                                                                                                                               | Quantitative; telephone survey                       | Optometric practices                      | 400                                                                                                                              | ✓   | ✓   |     | Low    | Low    |
| Yassaee <i>et al.</i> (2017)<br><i>England</i>            | <i>General practice</i> : adolescents' experiences of their GP, whether poor reported GP experience was associated with worse physical and mental health measures and whether poor previous GP experience was linked to lower service utilisation. | Quantitative; cross-sectional survey                 | YP                                        | 5,335                                                                                                                            |     | ✓   |     | High   | Low    |

Table 2: Health topic and CYP population studied

| Health topic (e.g., dental, sexual)                                                                                                         | Specific population                                                                                                                                                                                                                                                                                                                                                                                                                                                                                                                                                                    | Primary healthcare setting                                                                                                                                                                                                                                                                                                                                                                  | Citations                                                                                                                                                                                                                                                                                  |
|---------------------------------------------------------------------------------------------------------------------------------------------|----------------------------------------------------------------------------------------------------------------------------------------------------------------------------------------------------------------------------------------------------------------------------------------------------------------------------------------------------------------------------------------------------------------------------------------------------------------------------------------------------------------------------------------------------------------------------------------|---------------------------------------------------------------------------------------------------------------------------------------------------------------------------------------------------------------------------------------------------------------------------------------------------------------------------------------------------------------------------------------------|--------------------------------------------------------------------------------------------------------------------------------------------------------------------------------------------------------------------------------------------------------------------------------------------|
| <b>Non-specific health condition (n=13)</b>                                                                                                 | <ul style="list-style-type: none"> <li>• Non-specific (n=5)</li> <li>• African and African-Caribbean fathers (n=1)</li> <li>• CYP from different socio-economic and ethnic groups (n=1)</li> <li>• CYP living in deprived areas (n=1)</li> <li>• CYP of Albanian survivors of modern slavery and sexual exploitation (n=1)</li> <li>• CYP migrants from Romania, Poland, Pakistan, or Somalia (n=1)</li> <li>• CYP with ADHD (n=1)</li> <li>• CYP with autism from an ethnic minority/migrant community (n=1)</li> <li>• South Asian and Gypsy/Travelling communities (n=1)</li> </ul> | <ul style="list-style-type: none"> <li>• General practice (n=4)</li> <li>• General practice and health visiting (n=3)</li> <li>• Primary care (all except dentist, n=2)</li> <li>• General practice and walk-in centres (n=1)</li> <li>• Health visiting (n=1)</li> <li>• General practice and pharmacy (n=1)</li> <li>• Not specified (preventative primary care services, n=1)</li> </ul> | Condon et al (2020); Brigham et al (2012); Bosley et al. (2021); Dando et al. (2019); Davey et al. (2013); French et al. (2020); Fox et al. (2017); Neill et al. (2015); Neill et al. (2016); Rashed et al. (2022); Satherley et al. (2021); Williams et al. (2012); Yassaee et al. (2017) |
| <b>Mental health (n=11)</b>                                                                                                                 | <ul style="list-style-type: none"> <li>• Non-specific (n=9)</li> <li>• CYP living in deprived areas (n=1)</li> <li>• CYP with autism (n=1)</li> </ul>                                                                                                                                                                                                                                                                                                                                                                                                                                  | <ul style="list-style-type: none"> <li>• General practice (n=11)</li> </ul>                                                                                                                                                                                                                                                                                                                 | Appleton et al. (2022); Coleman-Fountain et al. (2020); Corry and Leavey (2017); Crouch et al. (2019); Fox et al. (2015); Jobanputra and Singh (2020); Mughal et al. (2021); O'Brien et al. (2017); O'Brien et al. (2019); Roberts et al. (2014); Salaheddin and Mason (2016)              |
| <b>Gender diversity (n=1)</b>                                                                                                               | <ul style="list-style-type: none"> <li>• Non-specific (n=1)</li> </ul>                                                                                                                                                                                                                                                                                                                                                                                                                                                                                                                 | <ul style="list-style-type: none"> <li>• General practice (n=1)</li> </ul>                                                                                                                                                                                                                                                                                                                  | Rickett et al. (2021)                                                                                                                                                                                                                                                                      |
| <b>Chronic conditions (n=4) (allergies, n=1; inflammatory bowel disease, n=1; juvenile idiopathic arthritis, n=1; type 1 diabetes, n=1)</b> | <ul style="list-style-type: none"> <li>• Non-specific (n=3)</li> <li>• Black and minority ethnic CYP (n=1)</li> </ul>                                                                                                                                                                                                                                                                                                                                                                                                                                                                  | <ul style="list-style-type: none"> <li>• General practice (n=3)</li> <li>• Primary care (all except optometry) (n=1)</li> </ul>                                                                                                                                                                                                                                                             | Alexakis et al. (2015); Diwakar et al. (2019); Rapley et al. (2021); Usher-Smith et al. (2015)                                                                                                                                                                                             |

|                                                                                                              |                                                                                                                                                                                                   |                                                                                                                                                         |                                                                                                                                                                                        |
|--------------------------------------------------------------------------------------------------------------|---------------------------------------------------------------------------------------------------------------------------------------------------------------------------------------------------|---------------------------------------------------------------------------------------------------------------------------------------------------------|----------------------------------------------------------------------------------------------------------------------------------------------------------------------------------------|
| <b>Physical health (n=4)</b><br>(obesity, n=3; pneumonia or empyema, n=1; respiratory tract infections, n=1) | <ul style="list-style-type: none"> <li>• Non-specific (n=3)</li> <li>• Black African CYP (n=1)</li> </ul>                                                                                         | <ul style="list-style-type: none"> <li>• General practice (n=2)</li> <li>• Health visiting (n=2)</li> </ul>                                             | Crocker et al. (2013); Ingram et al. (2013); Ochieng (2020); Redsell et al. (2013); Turner et al. (2012)                                                                               |
| <b>Oral health (n=8)</b>                                                                                     | <ul style="list-style-type: none"> <li>• Non-specific (n=2)</li> <li>• CYP in care (n=2)</li> <li>• CYP living in deprived areas (n=3)</li> <li>• CYP with learning disabilities (n=1)</li> </ul> | <ul style="list-style-type: none"> <li>• Dental care (n=6)</li> <li>• Health visiting (n=2)</li> </ul>                                                  | Coyle et al. (2013); Dickson (2015); Eskyte et al. (2021); Henderson and Rubin (2014); Lewney et al. (2019); Muirhead et al. (2017); Roberts and Condon (2014); Williams et al. (2014) |
| <b>Sexual health (n=4)</b>                                                                                   | <ul style="list-style-type: none"> <li>• Non-specific (n=4)</li> </ul>                                                                                                                            | <ul style="list-style-type: none"> <li>• General practice (n=2)</li> <li>• Pharmacy (n=1)</li> <li>• Pharmacy and sexual health clinic (n=1)</li> </ul> | Ahmaro et al. (2021); Jones et al. (2017); McDonagh et al. (2020); Turnbull et al. (2021)                                                                                              |
| <b>Optometry (n=1)</b>                                                                                       | <ul style="list-style-type: none"> <li>• Younger CYP and CYP with autism (n=1)</li> </ul>                                                                                                         | <ul style="list-style-type: none"> <li>• Optometric practices (n=1)</li> </ul>                                                                          | Wilson et al. (2021)                                                                                                                                                                   |
