# Supplementary material for: Access to primary care for children and young people (CYP) in the UK: a scoping review of CYP’s, caregivers’ and healthcare professionals’ views and experiences of facilitators and barriers
Source: BMJ Open. 2024 May 30;14(5):e081620. doi: 10.1136/bmjopen-2023-081620 (PMC11141190; doi:10.1136/bmjopen-2023-081620)
Supplement: Supplementary data [file bmjopen-2023-081620supp005.xlsx]

## Sheet: Sheet2
Author	Deciding to access care: Identifying a health issue as worthy of attention from a HCP	Deciding access care: Consulting with family and social networks about symptoms	Deciding to access care: Surmounting stigma, experiences of discrimination, and embarrassment	Reaching and entering services: The supply of services	Reaching and entering services: Knowledge, confidence, and access to information about services and treatment	Reaching and entering services: Family-friendly healthcare settings	Reaching and entering services: Delayed or rejected referrals to secondary or adult care	Communication and trust: Enabling CYP and caregivers to disclose their concerns	Communication and trust: Confidentiality and parental involvement	Communication and trust: HCP knowledge and competence	Design	Who	Quality rating
Ahmaro et al. (2021)			1	1				1			Qualitative; interviews	YP	High
Alexakis et al. (2015)		1						1		1	Qualitative; interviews	YP	High
Appleton et al. (2022)						1		1		1	Qualitative; interviews	YP and caregivers	High
Bosley et al. (2021)				1	1			1			Qualitative; focus groups and interviews	Caregivers	Medium
Brigham et al. (2012)											Qualitative; focus groups	HCPs	Low
Coleman-Fountain et al. (2020)	1										Qualitative; interviews	YP	High
Condon et al. (2020)			1		1						Qualitative; focus groups	Caregivers	High
Corry and Leavey (2017)			1					1	1	1	Qualitative; focus groups	YP	High
Coyle et al. (2013)										1	Quantitative; survey	HCPs	Low
Crocker et al. (2013)				1							Mixed methods; survey and structured interviews	Caregivers	Low
Crouch et al. (2019)					1		1	1			Qualitative; interviews	Caregivers	High
Dando et al. (2019)			1								Qualitative; interviews	Caregivers	Low
Davey et al. (2013)				1	1			1	1		Qualitative; interviews	YP	Medium
Dickson (2015)				1							Qualitative; interviews	Caregivers	Low
Diwakar et al. (2019)					1			1		1	Qualitative; interviews	Caregivers	Medium
Eskytė et al. (2021)	1			1	1					1	Qualitative; interviews and focus groups	HCPs	High
Fox et al. (2017)		1	1		1						Qualitative; interviews	Caregivers	High
Fox et al. (2015)						1	1	1	1	1	Mixed methods; online survey and interviews	HCPs	Medium
French et al. (2020)			1	1	1		1			1	Qualitative; interviews	HCPs, adults with ADHD, caregivers	Medium
Henderson and Rubin (2014)	1				1						Qualitative; focus groups and interviews	HCPs, school staff, caregivers and CYP	Low
Ingram et al. (2013)	1	1		1						1	Qualitative; focus groups and interviews	Caregivers	Medium
Jobanputra and Singh (2020)							1		1	1	Qualitative; interviews	HCPs	Low
Jones et al. (2017)			1	1	1			1			Qualitative; interviews	YP	High
Lewney et al. (2019)				1	1					1	Qualitative; interviews	HCPs	High
McDonagh et al. (2020)			1	1	1			1			Qualitative; interviews	YP	Medium
Mughal et al. (2021)	1		1	1	1			1	1		Qualitative; interviews	YP	Medium
Muirhead et al. (2017)				1							Qualitative; focus groups	Caregivers	Medium
Neill et al. (2016)*	1	1		1		1		1		1	Qualitative; focus groups and interviews	Caregivers	High
Neill et al. (2015)*	1	1		1	1			1			Qualitative; focus groups and interviews	Caregivers	High
O’Brien et al. (2019)							1				Quantitative; cross-sectional survey	HCPs	High
O’Brien et al. (2017)			1		1		1			1	Qualitative; interviews	HCPs	High
Ochieng (2020)			1							1	Qualitative; focus groups	Caregivers and HCPs	High
Rapley et al. (2021)				1	1		1			1	Qualitative; interviews	Caregivers and HCPs	High
Rashed et al. (2022)				1	1	1		1			Mixed; survey with closed and open questions	Caregivers and YP	Low
Redsell et al. (2013)								1		1	Qualitative; interviews	HCPs	Low
Rickett et al. (2021)			1		1					1	Mixed; survey with closed and open questions	Caregivers	Medium
Roberts et al. (2014)								1	1	1	Qualitative; interviews	HCPs	Low
Roberts and Condon (2014)	1			1		1					Qualitative; interviews	Caregivers	Low
Salaheddin and Mason (2016)			1								Mixed; survey with closed and open questions	YP	Low
Satherley et al. (2021)			1					1			Qualitative; interviews	Caregivers	High
Turnbull et al. (2021)			1	1				1			Qualitative; interviews	YP	Medium
Turner et al. (2012)			1					1		1	Qualitative; interviews	Caregivers	Low
Usher-Smith et al. (2015)	1			1							Quantitative; survey	Caregivers	Medium
Williams et al. (2014)				1				1			Qualitative; interviews and routinely collected data	HCPs, social workers, CYP, and caregivers	Low
Williams et al. (2012)			1			1				1	Qualitative; focus groups	Caregivers	Medium
Wilson et al. (2021)				1							Quantitative; telephone survey	Optometric practices	Low
Yassaee et al. (2017)								1			Quantitative; cross-sectional survey	YP	High
